# Supplementary material for: Common variants in LTBP3 gene contributed to the risk of hip osteoarthritis in Han Chinese population
Source: PubMed Central journal article supplement (PMC7284319; doi:10.1042/bsr20192999), 2020-06-09
Supplement: BSR-2019-2999_supp.pdf [file BSR-2019-2999_supp.pdf]

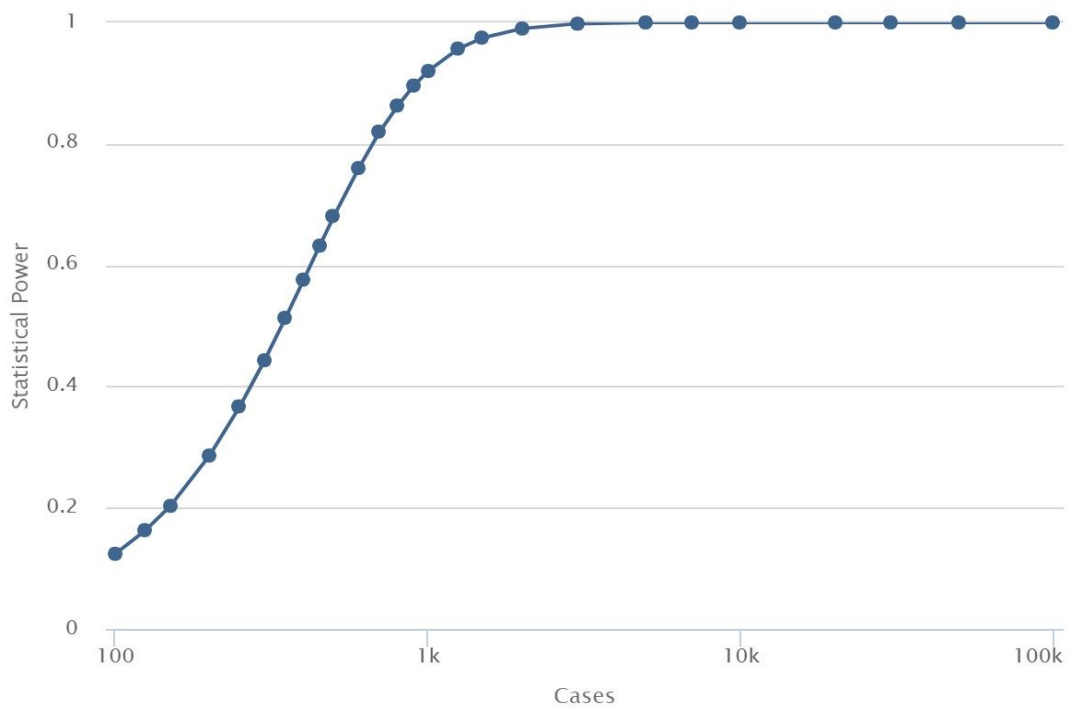

**Supplemental Figure S1.** Results of the statistical analysis for the present study. Expected number of cases versus statistical power of the present study.

**Supplemental Table S1.** Basic information of the 9 selected SNPs for genotyping

| CHR | POS      | SNP         | Minor Allele | Major Allele | MAF  | HWE  | Function     |
|-----|----------|-------------|--------------|--------------|------|------|--------------|
| 11  | 65539637 | rs149115544 | G            | A            | 0.06 | 0.55 | intron       |
| 11  | 65539931 | rs11227217  | T            | C            | 0.18 | 1.00 | intron       |
| 11  | 65542976 | rs60514964  | G            | A            | 0.08 | 0.25 | intron       |
| 11  | 65542980 | rs184791507 | A            | G            | 0.05 | 0.29 | intron       |
| 11  | 65548911 | rs11601767  | C            | T            | 0.36 | 0.92 | intron       |
| 11  | 65552280 | rs11545200  | A            | G            | 0.06 | 1.00 | missense     |
| 11  | 65552515 | rs4099470   | T            | C            | 0.13 | 0.68 | intron       |
| 11  | 65552969 | rs117063418 | A            | G            | 0.06 | 0.38 | coding-synon |
| 11  | 65556254 | rs10896015  | A            | G            | 0.23 | 0.34 | intron       |

CHR: chromosome; POS: position; MAF: minor allele frequency; HWE: *P*-value of Hardy-Weinberg equilibrium tests in controls.

**Supplemental Table S2.** Parameters utilized in statistical power analysis

| Parameters      | Values   | Note                                              |
|-----------------|----------|---------------------------------------------------|
| Mode            | Additive | -                                                 |
| Relative risk   | 1.3      | -                                                 |
| MAF             | 0.13     | Average MAF of the 9 SNPs in 1000 genome CHB data |
| Cases: Controls | 0.464    | -                                                 |
| $\alpha$        | 0.006    | 0.05/9                                            |
| Prevalence      | 4.2%     | Ref: PMID 25775186                                |

**Supplemental Table S3.** eQTL signals achieved genome-wide significance for SNP rs10896015 in multiple

human tissues based on data extracted from GTEx database

| GENE                | SNP        | Ref_Alt | P-Value                | NES   | Tissue                              |
|---------------------|------------|---------|------------------------|-------|-------------------------------------|
| <i>AP000769.1</i>   | rs10896015 | G_A     | $1.30 \times 10^{-5}$  | 0.21  | Cells - Transformed fibroblasts     |
| <i>AP000769.1</i>   | rs10896015 | G_A     | $1.30 \times 10^{-9}$  | 0.33  | Muscle - Skeletal                   |
| <i>AP000769.1</i>   | rs10896015 | G_A     | $2.20 \times 10^{-8}$  | 0.3   | Nerve - Tibial                      |
| <i>AP000769.1</i>   | rs10896015 | G_A     | $9.40 \times 10^{-6}$  | 0.29  | Skin - Not Sun Exposed (Suprapubic) |
| <i>FAM89B</i>       | rs10896015 | G_A     | $2.60 \times 10^{-7}$  | 0.18  | Muscle - Skeletal                   |
| <i>KRT8P26</i>      | rs10896015 | G_A     | $3.50 \times 10^{-5}$  | -0.33 | Breast - Mammary Tissue             |
| <i>KRT8P26</i>      | rs10896015 | G_A     | $4.60 \times 10^{-5}$  | -0.3  | Cells - Transformed fibroblasts     |
| <i>KRT8P26</i>      | rs10896015 | G_A     | $1.10 \times 10^{-4}$  | -0.29 | Thyroid                             |
| <i>LTBP3</i>        | rs10896015 | G_A     | $1.90 \times 10^{-5}$  | 0.11  | Adipose - Subcutaneous              |
| <i>LTBP3</i>        | rs10896015 | G_A     | $7.70 \times 10^{-7}$  | 0.16  | Muscle - Skeletal                   |
| <i>LTBP3</i>        | rs10896015 | G_A     | $5.40 \times 10^{-12}$ | 0.21  | Nerve - Tibial                      |
| <i>LTBP3</i>        | rs10896015 | G_A     | $6.20 \times 10^{-5}$  | 0.11  | Skin - Sun Exposed (Lower leg)      |
| <i>MALAT1</i>       | rs10896015 | G_A     | $9.60 \times 10^{-6}$  | -0.18 | Muscle - Skeletal                   |
| <i>MAP3K11</i>      | rs10896015 | G_A     | $2.60 \times 10^{-5}$  | -0.2  | Thyroid                             |
| <i>NEAT1</i>        | rs10896015 | G_A     | $1.30 \times 10^{-5}$  | 0.34  | Adipose - Subcutaneous              |
| <i>NEAT1</i>        | rs10896015 | G_A     | $2.50 \times 10^{-7}$  | 0.34  | Adipose - Visceral (Omentum)        |
| <i>NEAT1</i>        | rs10896015 | G_A     | $5.30 \times 10^{-9}$  | 0.27  | Artery - Aorta                      |
| <i>NEAT1</i>        | rs10896015 | G_A     | $4.20 \times 10^{-7}$  | 0.19  | Artery - Tibial                     |
| <i>NEAT1</i>        | rs10896015 | G_A     | $5.00 \times 10^{-6}$  | 0.16  | Cells - Transformed fibroblasts     |
| <i>NEAT1</i>        | rs10896015 | G_A     | $3.60 \times 10^{-8}$  | 0.4   | Colon - Transverse                  |
| <i>NEAT1</i>        | rs10896015 | G_A     | $7.50 \times 10^{-10}$ | 0.32  | Esophagus - Mucosa                  |
| <i>NEAT1</i>        | rs10896015 | G_A     | $7.60 \times 10^{-10}$ | 0.3   | Esophagus - Muscularis              |
| <i>NEAT1</i>        | rs10896015 | G_A     | $4.40 \times 10^{-5}$  | 0.2   | Heart - Atrial Appendage            |
| <i>NEAT1</i>        | rs10896015 | G_A     | $4.40 \times 10^{-5}$  | 0.21  | Heart - Left Ventricle              |
| <i>NEAT1</i>        | rs10896015 | G_A     | $1.00 \times 10^{-8}$  | 0.25  | Lung                                |
| <i>NEAT1</i>        | rs10896015 | G_A     | $6.20 \times 10^{-10}$ | 0.23  | Muscle - Skeletal                   |
| <i>NEAT1</i>        | rs10896015 | G_A     | $1.20 \times 10^{-13}$ | 0.36  | Nerve - Tibial                      |
| <i>NEAT1</i>        | rs10896015 | G_A     | $2.50 \times 10^{-5}$  | 0.28  | Pituitary                           |
| <i>NEAT1</i>        | rs10896015 | G_A     | $2.30 \times 10^{-6}$  | 0.25  | Skin - Not Sun Exposed (Suprapubic) |
| <i>NEAT1</i>        | rs10896015 | G_A     | $4.20 \times 10^{-7}$  | 0.22  | Skin - Sun Exposed (Lower leg)      |
| <i>NEAT1</i>        | rs10896015 | G_A     | $3.90 \times 10^{-7}$  | 0.34  | Stomach                             |
| <i>NEAT1</i>        | rs10896015 | G_A     | $4.00 \times 10^{-7}$  | 0.21  | Thyroid                             |
| <i>PCNXL3</i>       | rs10896015 | G_A     | $1.20 \times 10^{-4}$  | -0.11 | Nerve - Tibial                      |
| <i>RNASEH2C</i>     | rs10896015 | G_A     | $2.00 \times 10^{-8}$  | -0.18 | Muscle - Skeletal                   |
| <i>RP11-770G2.4</i> | rs10896015 | G_A     | $2.60 \times 10^{-5}$  | 0.3   | Testis                              |
| <i>SSSCAI-AS1</i>   | rs10896015 | G_A     | $2.80 \times 10^{-5}$  | 0.28  | Adipose - Subcutaneous              |
| <i>SSSCAI-AS1</i>   | rs10896015 | G_A     | $1.50 \times 10^{-6}$  | 0.24  | Artery - Tibial                     |
| <i>SSSCAI-AS1</i>   | rs10896015 | G_A     | $2.70 \times 10^{-7}$  | 0.7   | Cells - EBV-transformed lymphocytes |
| <i>SSSCAI-AS1</i>   | rs10896015 | G_A     | $2.10 \times 10^{-5}$  | 0.32  | Colon - Sigmoid                     |
| <i>SSSCAI-AS1</i>   | rs10896015 | G_A     | $4.00 \times 10^{-6}$  | 0.23  | Muscle - Skeletal                   |
| <i>SSSCAI-AS1</i>   | rs10896015 | G_A     | $7.10 \times 10^{-5}$  | 0.25  | Skin - Sun Exposed (Lower leg)      |
| <i>SSSCAI-AS1</i>   | rs10896015 | G_A     | $2.10 \times 10^{-6}$  | 0.28  | Thyroid                             |

NES: normalized effect size.
